# Supplementary material for: From Anti-EBV Immune Responses to the EBV Diseasome via Cross-reactivity
Source: PubMed Central journal article supplement (PMC7490125; doi:10.1055/s-0040-1715641), 2020-08-31
Supplement: 10-1055-s-0040-1715641-s2000010.pdf [file 10-1055-s-0040-1715641-s2000010.pdf]

**Supplementary Table S1** EBV immunome consisting of 3,197 immunopositive linear epitopes, assembled from IEDB [50], and listed by IEDB ID number.

130; 272; 351; 408; 950; 1090; 1219; 1284; 1296; 1432; 1433; 1434; 1511; 1518; 1612; 1716; 1997; 2390; 2742; 2743; 3004; 3005; 3537; 3538; 3579; 3586; 3600; 3628; 3713; 3732; 3772; 3782; 3785; 3892; 3951; 4289; 4344; 5002; 5043; 5303; 5316; 5317; 5326; 5439; 5677; 5678; 5679; 5713; 5718; 5899; 5915; 5938; 6136; 6482; 6564; 6568; 6611; 6808; 7353; 7358; 7751; 7835; 8120; 8191; 8378; 8395; 8396; 8397; 8905; 9644; 9646; 10105; 10448; 10561; 10830; 10856; 10858; 10888; 10926; 10929; 10963; 11388; 11421; 11422; 11460; 11525; 11651; 11804; 11805; 11806; 11807; 12183; 12325; 12419; 13483; 13628; 13701; 13748; 13859; 13893; 14052; 14635; 15051; 15141; 15168; 15827; 16044; 16548; 16876; 16878; 16978; 16979; 17110; 17111; 17600; 17619; 17620; 17635; 18031; 18110; 18328; 18357; 18409; 18433; 18438; 18446; 18462; 18587; 18588; 18650; 18884; 18946; 19672; 19674; 19704; 19737; 19738; 20011; 20020; 20023; 20487; 20788; 20892; 21252; 21697; 21719; 21723; 21771; 21839; 21870; 21968; 22159; 22162; 22447; 22976; 23103; 23324; 23325; 23434; 23449; 23550; 23994; 24097; 24170; 24525; 24533; 24535; 24536; 24666; 24667; 25098; 25192; 25237; 25351; 25756; 25942; 26408; 26480; 26538; 26761; 26897; 26981; 27103; 27118; 27161; 27301; 27375; 27423; 27611; 27955; 27992; 28135; 29332; 29466; 29467; 29468; 29469; 29472; 29618; 29720; 29721; 30164; 30266; 30430; 30431; 30951; 31071; 31155; 32853; 32945; 33207; 33208; 33209; 33483; 33650; 33865; 33866; 33867; 35158; 35162; 35210; 35533; 35694; 35887; 36605; 36656; 37000; 37153; 37308; 37499; 37533; 37769; 37887; 37938; 37949; 37959; 37960; 38052; 38427; 38458; 38460; 38514; 38633; 38647; 38669; 38670; 38851; 39030; 39079; 39080; 39102; 39335; 39432; 39634; 39681; 39790; 39890; 40474; 40572; 40573; 40687; 40710; 40845; 40972; 41113; 41147; 41508; 41628; 41841; 42110; 42525; 42941; 43109; 43444; 43517; 44181; 44333; 44860; 44862; 45378; 45379; 45380; 45466; 45499; 45501; 46498; 46673; 46895; 46923; 47613; 47636; 47760; 47807; 47838; 47846; 47857; 48320; 48472; 48486; 48735; 48736; 48737; 48738; 48752; 48836; 48852; 48864; 48876; 48911; 48946; 48948; 48974; 48975; 48976; 49007; 49008; 49056; 49190; 49257; 49258; 49442; 49539; 49593; 49594; 49752; 49864; 49956; 50128; 50129; 50130; 50223; 50250; 50298; 50329; 50502; 50669; 50940; 50944; 50989; 51037; 51177; 51178; 51245; 51245; 51534; 51558; 51685; 51794; 51795; 51946; 51947; 51969; 52078; 52142; 52268; 52367; 52582; 52792; 53127; 53128; 53129; 53148; 53159; 53359; 53381; 53886; 53963; 54330; 54331; 54367; 54548; 54728; 55150; 55151; 55251; 55252; 55253; 55254; 55298; 55299; 55317; 55326; 55327; 55336; 55363; 55529; 55585; 55592; 55619; 55620; 55629; 55657; 55670; 55684; 55718; 55734; 56144; 56390; 56433; 56506; 56511; 56523; 56563; 56650; 56651; 56897; 57170; 57560; 57755; 58070; 58192; 58193; 59084; 59132; 59432; 59551; 59875; 60219; 60264; 60373; 60782; 60791; 60930; 60931; 61040; 61477; 61577; 62305; 62445; 62446; 62508; 62509; 62621; 62738; 62739; 63155; 63546; 63843; 64763; 64794; 64942; 65466; 65746; 66322; 66323; 66324; 67007; 67130; 67131; 67299; 67349; 67350; 67416; 67419; 67456; 67484; 67505; 67506; 67891; 68229; 68422; 68517; 68518; 68561; 68579; 68853; 69309; 69558; 69559; 69731; 69835; 70014; 70017; 70251; 70315; 70413; 70466; 70529; 70624; 70901; 70932; 71181; 71968; 71997; 72028; 72029; 72030; 72213; 73221; 72240; 72251; 72698; 72877; 72963; 72970; 73146; 73322; 73853; 73861; 73862; 74111; 74120; 74401; 74402; 74772; 74774; 74886; 74887; 75188; 75189; 75356; 75358; 75360; 75471; 75533; 75673; 75731; 76275; 76333; 77774; 77775; 78346; 78382; 78432; 78501; 78534; 79527; 79634; 80152; 80251; 80335; 80457; 80493; 82545; 82914; 82959; 84989; 85686; 86674; 86900; 86944; 87003; 87359; 87642; 88362; 89071; 89152; 89413; 92645; 93173; 93251; 93570; 93709; 94034; 94962; 95077; 95086; 95093; 95234; 95336; 95399; 95423; 95428; 95676; 97209; 97317; 97532; 97668; 97743; 98084; 98564; 98685; 98695; 98739; 98770; 98877; 98943; 99019; 99064; 99066; 101256; 101380; 101467; 101654; 101878; 102036; 102119; 102253; 105092; 105109; 105124; 105126; 105154; 105155; 105156; 105167; 105186; 105197; 105225; 105230; 105247; 105249; 105270; 105276; 105277; 105293; 105295; 105307; 105315; 105333; 105334; 105413; 105479; 105491; 105503; 105504; 105557; 105590; 105824; 106067; 106070; 106084; 107724; 107771; 107869; 108006; 108083; 108191; 108601; 108668; 108936; 113211; 114562; 114667; 115656; 118770; 118776; 118800; 118801; 118806; 118807; 118809; 118817; 118824; 118827; 118828; 118930; 118948; 118970; 118976; 118994; 119004; 119011; 119013; 119022; 119155; 119216; 119307; 119614; 119738; 120221; 120960; 124606; 124861; 125726; 125747; 125790; 126051; 126128; 126207; 126528; 126690; 126919; 126967; 126970; 126980; 126985; 126986; 126990; 126991; 127118; 127119; 127195; 127267; 127369; 127392; 127408; 127484; 127626; 127771; 127781; 127989; 127990; 128009; 132023; 132096; 132781; 132901; 134679; 136122; 136167; 136316; 136514; 136557; 136570; 136706; 137773; 138854; 138856; 138859; 138881; 138882; 138887; 138917; 138934; 141230; 141342; 144712; 144763; 144799; 149653; 149659; 149727; 149795; 149798; 149830; 149869; 149882; 149899; 150018; 150019; 158594; 164543; 167590; 181016; 181017; 182399; 182408; 186702; 186927; 187222; 187225; 191290; 193620; 193621; 193631; 193713; 193714; 193715; 193717; 193722; 193723; 193839; 193898; 193901; 193902; 193919; 193924; 193996; 194001; 194116; 194126; 194129; 194160; 194178; 194194; 194202; 194233; 194236; 194239; 194240; 194241; 194259; 194260; 194392; 194431; 194442; 194443; 194448; 194449; 194450; 194503; 194534; 194535; 194555; 194657; 227006; 227016; 227017; 227018; 227019; 227020; 227021; 227022; 227023; 227024; 227025; 227041; 227094; 227095; 227100; 227110; 227143; 227163; 227188; 227189; 227204; 227208; 227226; 227256; 227309; 227311; 227369; 227460; 227478; 227504; 227513; 227516; 227517; 227537; 227561; 227587; 227670; 227673; 227777; 227778; 229092; 229099; 229458; 230371; 230392; 230413; 230608; 230640; 230770; 230798; 230966; 231029; 231136; 231402; 231403; 231419; 231477; 231489; 231547; 231549; 231553; 231629; 231634; 231642; 231668; 231672; 231676; 231696; 231699; 231707; 231748; 231755; 231765; 231766; 231770; 231800; 231802; 231813; 231825; 231829; 231833; 231839; 231840; 231842; 231844; 231851; 231853; 231854; 231855; 231857; 231860; 231864; 231865; 231880; 231882; 231890; 231899; 231908; 231909; 231921; 231932; 231936; 231940; 231966; 231967; 231969; 231974; 231975; 231988; 231995; 231998; 232020; 232021; 232030; 232031; 232042; 232043; 232044; 232045; 232046; 232074; 232078; 232080; 232081; 232082; 232085; 232086; 232095; 232096; 232097; 232098; 232103; 232141; 232142; 232147; 232149; 232177; 232178; 232184; 232185; 232187; 232193; 232194; 232199; 232209; 232210; 232214; 232232; 232242; 232276; 232281; 232292; 232308; 232309; 232315; 232331; 232332; 232341; 232354; 232357; 232367; 232368; 232371; 232408; 232410; 232416; 232419; 232427; 232437; 232441; 232442; 232466; 232470; 232471; 232472; 232473; 232474; 232475; 232476; 232477; 232478; 232479; 232480; 232481; 232482; 232483; 232484; 232485; 232486; 232487; 232488; 232489; 232490; 232491; 232492; 232493; 232494; 232495; 232496; 232497; 232498; 232499; 232500; 232501; 232502; 232503; 232504; 232505; 232506; 232507; 232508; 232509; 232510; 232511; 232512; 232513; 232514; 232515; 232516; 232517; 232518; 232519; 232520; 232521; 232522; 232523; 232524; 232525; 232526; 232527; 232528; 232529; 232530; 232531; 232532; 232533; 232534; 232535; 232536; 232537; 232538; 232539; 232540; 232541; 232542; 232543; 232544; 232545; 232546; 232547; 232548; 232549; 232550; 232551; 232552; 232553; 232554; 232555; 232556; 232557; 232558; 232559; 232560; 232561; 232562; 232563; 232564; 232565; 232566; 232567; 232568; 232569; 232570; 232571; 232572; 232573; 232574; 232575; 232576; 232577; 232578; 232579; 232580; 232581; 232582; 232583; 232584; 232585; 232586; 232587; 232588; 232589; 232590; 232591; 232592; 232593; 232594; 232595; 232596; 232597; 232598; 232599; 232600; 232601; 232602; 232603; 232604; 232605; 232606; 232607; 232608; 232609; 232610; 232611; 232612; 232613; 232614; 232615; 232616; 232617; 232618; 232619; 232620; 232621; 232622; 232623; 232624; 232625; 232626; 232627; 232628; 232629; 232630; 232631; 232632; 232633; 232634; 232635; 232636; 232637; 232638; 232639; 232640; 232641; 232642; 232643; 232644; 232645; 232646; 232647; 232648; 232649; 232650; 232651; 232652; 232653; 232654; 232655; 232656; 232657; 232658; 232659; 232660; 232661; 232662; 232663; 232664; 232665; 232666; 232667; 232668; 232669; 232670; 232671; 232672; 232673; 232674; 232675; 232676; 232677; 232678; 232679; 232680; 232681; 232682; 232683; 232684; 232685; 232686; 232687; 232688; 232689; 232690; 232691; 232692; 232693; 232694; 232695; 232696; 232697; 232698; 232699; 232700; 232701; 232702; 232703; 232704; 232705; 232706; 232707; 232708; 232709; 232710; 232711; 232712; 232713; 232714; 232715; 232716; 232717; 232718; 232719; 232720; 232721; 232722; 232723; 232724; 232725; 232726; 232727; 232728; 232729; 232730; 232731; 232732; 232733; 232734; 232735; 232736; 232737; 232738; 232739; 232740; 232741; 232742; 232743; 232744; 232745; 232746; 232747; 232748; 232749; 232750; 232751; 232752; 232753; 232754; 232755; 232756; 232757; 232758; 232759; 232760; 232761; 232762; 232763; 232764; 232765; 232766; 232767; 232768; 232769; 232770; 232771; 232772; 232773; 232774; 232775; 232776; 232777; 232778; 232779; 232780; 232781; 232782; 232783; 232784; 232785; 232786; 232787; 232788; 232789; 232790; 232791; 232792; 232793; 232794; 232795; 232796; 232797; 232798; 232799; 232800; 232801; 232802; 232803; 232804; 232805; 232806; 232807; 232808; 232809; 232810; 232811; 232812; 232813; 232814; 232815; 232816; 232817; 232818; 232819; 232820; 232821; 232822; 232823; 232824; 232825; 232826; 232827; 232828; 232829; 232830; 232831; 232832; 232833; 232834; 232835; 232836; 232837; 232838; 232839; 232840; 232841; 232842; 232843; 232844; 232845; 232846; 232847; 232848; 232849; 232850; 232851; 232852; 232853; 232854; 232855; 232856; 232857; 232858; 232859; 232860; 232861; 232862; 232863; 232864; 232865; 232866; 232867; 232868; 232869; 232870; 232871; 232872; 232873; 232874; 232875; 232876; 232877; 232878; 232879; 232880; 232881; 232882; 232883; 232884; 232885; 232886; 232887; 232888; 232889; 232890; 232891; 232892; 232893; 232894; 232895; 232896; 232897; 232898; 232899; 232900; 232901; 232902; 232903; 232904; 232905; 232906; 232907; 232908; 232909; 232910; 232911; 232912; 232913; 232914; 232915; 232916; 232917; 232918; 232919; 232920; 232921; 232922; 232923; 232924; 232925; 232926; 232927; 232928; 232929; 232930; 232931; 232932; 232933; 232934; 232935; 232936; 232937; 232938; 232939; 232940; 232941; 232942; 232943; 232944; 232945; 232946; 232947; 232948; 232949; 232950; 232951; 232952; 232953; 232954; 232955; 232956; 232957; 232958; 232959; 232960; 232961; 232962; 232963; 232964; 232965; 232966; 232967; 232968; 232969; 232970; 232971; 232972; 232973; 232974; 232975; 232976; 232977; 232978; 232979; 232980; 232981; 232982; 232983; 232984; 232985; 232986; 232987; 232988; 232989; 232990; 232991; 232992; 232993; 232994; 232995; 232996; 232997; 232998; 232999; 233000; 233001; 233002; 233003; 233004; 233005; 233006; 233007; 233008; 233009; 233010; 233011; 233012; 233013; 233014; 233015; 233016; 233017; 233018; 233019; 233020; 233021; 233022; 233023; 233024; 233025; 233026; 233027; 233028; 233029; 233030; 233031; 233032; 233033; 233034; 233035; 233036; 233037; 233038; 233039; 233040; 233041; 233042; 233043; 233044; 233045; 233046; 233047; 233048; 233049; 233050; 233051; 233052; 233053; 233054; 233055; 233056; 233057; 233058; 233059; 233060; 233061; 233062; 233063; 233064; 233065; 233066; 233067; 233068; 233069; 233070; 233071; 233072; 233073; 233074; 233075; 233076; 233077; 233078; 233079; 233080; 233081; 233082; 233083; 233084; 233085; 233086; 233087; 233088; 233089; 233090; 233091; 233092; 233093; 233094; 233095; 233096; 233097; 233098; 233099; 233100; 233101; 233102; 233103; 233104; 233105; 233106; 233107; 233108; 233109; 233110; 233111; 233112; 233113; 233114; 233115; 233116; 233117; 233118; 233119; 233120; 233121; 2331



696402; 696404; 696405; 696406; 696407; 696409; 696410; 696412; 696413; 696414; 696416; 696417; 696418; 696419; 696420; 696424; 696425; 696426; 696427; 696430; 696431; 696432; 696434; 696435; 696439; 696440; 696446; 696447; 696450; 696453; 696454; 696456; 696457; 696459; 696462; 696463; 696465; 696466; 696467; 696468; 696472; 696473; 696479; 696483; 696484; 696486; 696488; 696490; 696492; 696493; 696494; 696496; 696497; 696498; 696499; 696500; 696503; 696507; 696509; 696514; 696517; 696521; 696522; 696525; 696526; 696529; 696531; 696532; 696533; 696534; 696536; 696538; 696539; 696540; 696542; 696543; 696544; 696545; 696546; 696547; 696548; 696549; 696552; 696553; 696555; 696556; 696557; 696559; 696560; 696561; 696563; 696564; 696565; 696566; 696567; 696568; 696569; 696570; 696571; 696574; 696575; 696576; 696579; 696581; 696582; 696583; 696585; 696586; 696587; 696588; 696589; 696592; 696595; 696599; 696600; 696602; 696605; 696606; 696608; 696609; 696611; 696613; 696615; 696616; 696619; 696620; 696621; 696622; 696623; 696624; 696626; 696627; 696629; 696630; 696633; 696634; 696635; 696636; 696639; 696640; 696644; 696650; 696651; 696652; 696653; 696654; 696655; 696656; 696658; 696660; 696664; 696665; 696666; 696670; 696672; 696674; 696675; 696677; 696678; 696681; 696682; 696683; 696684; 696685; 696687; 696689; 696697; 696700; 696701; 696702; 696703; 696710; 696711; 696716; 696718; 696719; 696722; 696723; 696729; 696730; 696731; 696733; 696734; 696735; 696736; 696737; 696739; 696740; 696745; 696746; 696747; 696748; 696749; 696750; 696751; 696753; 696754; 696755; 696756; 696757; 696758; 696759; 696760; 696762; 696763; 696764; 696766; 696767; 696771; 696773; 696774; 696776; 696777; 696778; 696780; 696783; 696784; 696785; 696787; 696788; 696789; 696791; 696794; 696795; 696796; 696797; 696798; 696799; 696800; 696801; 696802; 696803; 696804; 696806; 696807; 696808; 696812; 696813; 696818; 696819; 696822; 696827; 696828; 696829; 696830; 696831; 696832; 696833; 696835; 696839; 696844; 696845; 696846; 696848; 696849; 696850; 696851; 696852; 696853; 696854; 696856; 696857; 696859; 696861; 696862; 696863; 696864; 696865; 696866; 696867; 696871; 696874; 696875; 696876; 696877; 696880; 696881; 696883; 696886; 696888; 696889; 696890; 696891; 696892; 696895; 696896; 696898; 696900; 696901; 696902; 696903; 696904; 696908; 696909; 696914; 696916; 696917; 696918; 696919; 696923; 696924; 696927; 696928; 696929; 696930; 696931; 696932; 696934; 696935; 696936; 696937; 696943; 696944; 696945; 696946; 696948; 696949; 696951; 696952; 696953; 696954; 696957; 696958; 696959; 696961; 696962; 696963; 696970; 696971; 696972; 696973; 696974; 696975; 696976; 696977; 696978; 696979; 696980; 696983; 696984; 696985; 696986; 696997; 697000; 697001; 697002; 697003; 697004; 697006; 697007; 697008; 697009; 697012; 697013; 697015; 697016; 697017; 697018; 697019; 697020; 697021; 697022; 697023; 697024; 697026; 697027; 697029; 697030; 697032; 697033; 697036; 697039; 697040; 697042; 697043; 697044; 697045; 697046; 697050; 697051; 697052; 697053; 697054; 697055; 697056; 697057; 697058; 697059; 697061; 697063; 697065; 697066; 745459; 745467; 745468; 745478; 745479; 745480; 745481; 745491; 745503; 745504; 745507; 747194; 749416; 750156; 750177; 752950; 753257; 753261; 753262; 753269; 753272; 769602; 769737; 769739; 858179; 858188; 858269; 889912; 890842; 892246; 892317; 892893; 892951; 896128; 899328; 899655; 901245; 901682; 901996; 903350; 903869; 904179; 904373; 904706; 905277; 905725; 905858; 906292; 907160; 907462; 908430; 908489; 910573; 934271; 936806

Abbreviations: EBV, Epstein-Barr virus; IEDB, immune epitope DataBase.

Source: Epitope experimental details and references are available at [www.iedb.org](http://www.iedb.org).
